# Supplementary material for: Re-Analysis of Single-Nucleus Transcriptomics Reveals Diverse Dorsal Root Ganglia Macrophage Responses Following Peripheral Nerve Injury
Source: MDPI journal article supplement (doi:10.3390/biomedicines10123295), 2022-12-19
Supplement: s1 [file s1]

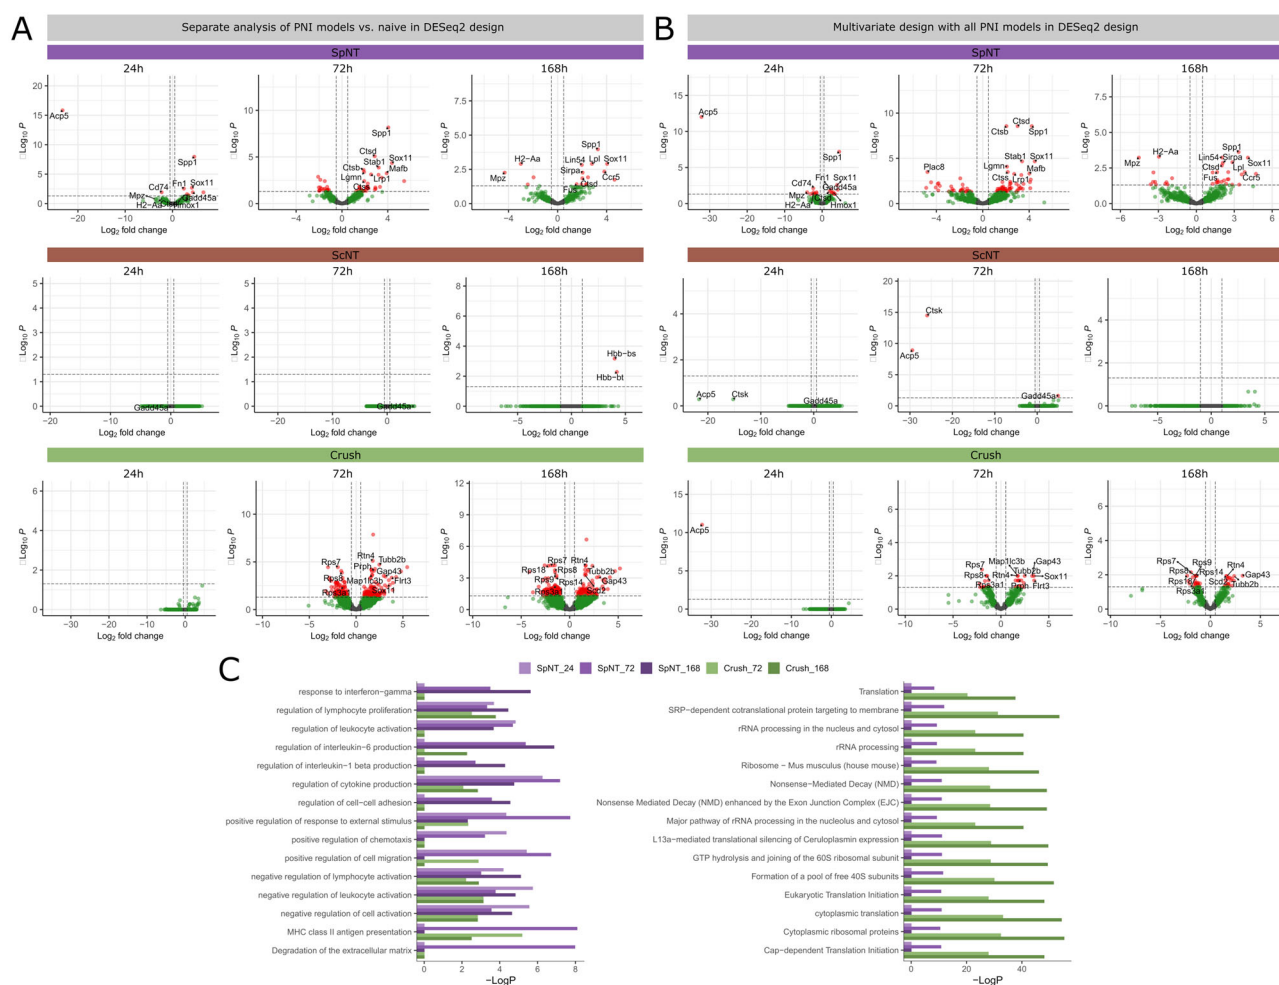

**Supplementary Figure S1.** Comparison of the two DESeq2 differential expression analysis approaches. **(a)** Analysis separately for each PNI model and its time points, contrasted to naïve; **(b)** Multivariate analysis design including all PNI models together, contrasted to naïve; **(c)** Pathways with highest enrichment in the SpNT (left) and Crush (right) groups using DEGs from DESeq2 analysis separately for each PNI model as in **(a)**. Volcano plots in **(a)** and **(b)** show the annotation for the 10 genes with lowest adjusted p value with multivariate analysis **(b)** which was used in the analysis of the main text.
